# Supplementary material
Source: HighWire-hosted journal article supplement (https://bmjopen.bmj.com/content/8/3/e020066)
Supplement: inline-supplementary-material-1 [file inline-supplementary-material-1.pdf]

**Appendix 1: Example data output extracted by NSPCC for NIM intervention resource use**

|                | Case Number | Recipient Type | Recipient Gender | Appointment Date | Appointment Duration | Attendance    | Attendee Role | NSPCC Staff Role | Organisation Referring To     |
|----------------|-------------|----------------|------------------|------------------|----------------------|---------------|---------------|------------------|-------------------------------|
| <i>example</i> | 10001       | child          | male             | 25/01/2016       | 90                   | attended      | child         | NULL             | NHS Greater Glasgow and Clyde |
| <i>example</i> | 10001       | child          | male             | 25/01/2016       | 90                   | attended      | NSPCC staff   | Practitioner     | NULL                          |
| <i>example</i> | 10002       | adult          | female           | 26/01/2016       | 120                  | DNA (no show) | adult         | NULL             | NULL                          |
| <i>example</i> | 10002       | adult          | female           | 26/01/2016       | 120                  | DNA (no show) | NSPCC staff   | Service Manager  | NULL                          |

## Appendix 2: CM contact data collection form for resource use

|            |                                                                                                                                                                                                                  | Effectiveness and cost-effectiveness of the New Orleans Intervention Model for infant Mental Health                                              |                                                                                                                                                           | <h3 style="text-align: center;">CONTACT DATA COLLECTION FORM</h3> <p style="text-align: center; color: red;">(please complete one row per contact using additional pages as necessary)</p> |                                                                                                                                   |                                                                                                                                   |  |
|--------------------------------------------------------------------------------------------|------------------------------------------------------------------------------------------------------------------------------------------------------------------------------------------------------------------|--------------------------------------------------------------------------------------------------------------------------------------------------|-----------------------------------------------------------------------------------------------------------------------------------------------------------|--------------------------------------------------------------------------------------------------------------------------------------------------------------------------------------------|-----------------------------------------------------------------------------------------------------------------------------------|-----------------------------------------------------------------------------------------------------------------------------------|--|
| <b>CHILD INITIALS</b> (Forename / Surname): Click or tap here to enter text.               |                                                                                                                                                                                                                  |                                                                                                                                                  |                                                                                                                                                           | <b>BeST ID:</b> Click or tap here to enter text.                                                                                                                                           |                                                                                                                                   |                                                                                                                                   |  |
| <b>GENDER</b> (please tick): <input type="checkbox"/> MALE <input type="checkbox"/> FEMALE |                                                                                                                                                                                                                  |                                                                                                                                                  |                                                                                                                                                           | <b>DATE OPENED:</b> Click or tap to enter a date. <b>DATE CASE CLOSED:</b> Click or tap to enter a date.                                                                                   |                                                                                                                                   |                                                                                                                                   |  |
| DATE                                                                                       | NATURE OF CONTACT                                                                                                                                                                                                | APPOINTMENT DURATION                                                                                                                             | IN ATTENDANCE:<br>(Who else was in attendance? e.g. <u>1</u> Birth parent <u>1</u> Child <u>2</u> Social workers)                                         |                                                                                                                                                                                            |                                                                                                                                   | REFERRAL OUT<br>Referral to outside services?                                                                                     |  |
| <b>15/01/2015</b><br><br><b>EXAMPLE</b>                                                    | <input checked="" type="checkbox"/> <b>Observed Contact</b><br><input type="checkbox"/> <b>Individual Interview</b><br><input type="checkbox"/> <b>Other, please specify</b><br>Click or tap here to enter text. | <b>Appointment</b><br><u>1</u> HRS <u>30</u> mins <input type="checkbox"/> <b>DNA</b><br><br><b>Administration</b><br><u>4</u> HRS <u>0</u> mins | <u>1</u> Birth parent<br>___ Foster carer<br><u>1</u> Child<br>___ Significant family member<br><u>1</u> Teacher / school staff<br>___ Child Psychologist | <u>2</u> Social worker<br>___ Social worker manager<br>___ Social care worker<br>___ GP/medical professional<br>___ Health visitor<br>___ Housing officer                                  | ___ Psychiatrist<br><u>1</u> Interpreter<br>___ Addiction worker<br>___ Other, please specify<br>Click or tap here to enter text. | <input checked="" type="checkbox"/> <b>Yes, please specify</b><br>Families for Children<br><br><input type="checkbox"/> <b>No</b> |  |
| Click or tap to enter a date.                                                              | <input type="checkbox"/> <b>Observed Contact</b><br><input type="checkbox"/> <b>Individual Interview</b><br><input type="checkbox"/> <b>Other, please specify</b><br>Click or tap here to enter text.            | <b>Appointment</b><br>___ HRS ___ mins <input type="checkbox"/> <b>DNA</b><br><br><b>Administration</b><br>___ HRS ___ mins                      | ___ Birth parent<br>___ Foster carer<br>___ Child<br>___ Significant family member<br>___ Teacher / school staff<br>___ Child Psychologist                | ___ Social worker<br>___ Social worker manager<br>___ Social care worker<br>___ GP/medical professional<br>___ Health visitor<br>___ Housing officer                                       | ___ Psychiatrist<br>___ Interpreter<br>___ Addiction worker<br>___ Other, please specify<br>Click or tap here to enter text.      | <input type="checkbox"/> <b>Yes, please specify</b><br>Click or tap here to enter text.<br><br><input type="checkbox"/> <b>No</b> |  |
| Click or tap to enter a date.<br><br><input type="checkbox"/> <b>AS ABOVE</b>              | <input type="checkbox"/> <b>Observed Contact</b><br><input type="checkbox"/> <b>Individual Interview</b><br><input type="checkbox"/> <b>Other, please specify</b><br>Click or tap here to enter text.            | <b>Appointment</b><br>___ HRS ___ mins <input type="checkbox"/> <b>DNA</b><br><br><b>Administration</b><br>___ HRS ___ mins                      | ___ Birth parent<br>___ Foster carer<br>___ Child<br>___ Significant family member<br>___ Teacher / school staff<br>___ Child Psychologist                | ___ Social worker<br>___ Social worker manager<br>___ Social care worker<br>___ GP/medical professional<br>___ Health visitor<br>___ Housing officer                                       | ___ Psychiatrist<br>___ Interpreter<br>___ Addiction worker<br>___ Other, please specify<br>Click or tap here to enter text.      | <input type="checkbox"/> <b>Yes, please specify</b><br>Click or tap here to enter text.<br><br><input type="checkbox"/> <b>No</b> |  |
| Click or tap to enter a date.<br><br><input type="checkbox"/> <b>AS ABOVE</b>              | <input type="checkbox"/> <b>Observed Contact</b><br><input type="checkbox"/> <b>Individual Interview</b><br><input type="checkbox"/> <b>Other, please specify</b><br>Click or tap here to enter text.            | <b>Appointment</b><br>___ HRS ___ mins <input type="checkbox"/> <b>DNA</b><br><br><b>Administration</b><br>___ HRS ___ mins                      | ___ Birth parent<br>___ Foster carer<br>___ Child<br>___ Significant family member<br>___ Teacher / school staff<br>___ Child Psychologist                | ___ Social worker<br>___ Social worker manager<br>___ Social care worker<br>___ GP/medical professional<br>___ Health visitor<br>___ Housing officer                                       | ___ Psychiatrist<br>___ Interpreter<br>___ Addiction worker<br>___ Other, please specify<br>Click or tap here to enter text.      | <input type="checkbox"/> <b>Yes, please specify</b><br>Click or tap here to enter text.<br><br><input type="checkbox"/> <b>No</b> |  |

### Appendix 3: Additional Service Use Questionnaire

In this form we are collecting the number of visits and time spent in services in the past **six months** (if you have fostered the child for less than six months, refer to the duration of time you have fostered the child). We need to know this for both you **and** the BeST study child (referred to as 'The Child'). We do not need to know the reason for the visit. All information will be kept strictly confidential. For each item indicated please write a **number** in the box. Please give your "**best guess**" where the exact number is uncertain. Please indicate **0** where there was no appointment or visit.

Child's BeST ID: \_\_\_\_\_ What is your relationship to the child?: ☐ Birth family ☐ Foster Carer

|                                        |                                                                |
|----------------------------------------|----------------------------------------------------------------|
| How long has the child been with you?: | Years <input type="checkbox"/> Months <input type="checkbox"/> |
|----------------------------------------|----------------------------------------------------------------|

**Example: Number of Visits ~ In the past six months how many times have you or the child attended the following services?:**

|             | Yourself | The Child |
|-------------|----------|-----------|
| Example: GP | 0        | 2         |

**In the past six months how many times have you or the child visited or used the following services?:** (if you have fostered the child for less than six months, consider the duration of time you have fostered the child)

|                                                   | Yourself | The Child |
|---------------------------------------------------|----------|-----------|
| GP                                                |          |           |
| NHS 24 (Number of calls)                          |          |           |
| Paediatrician (children's doctor)                 |          |           |
| Dentist                                           |          |           |
| Hospital outpatient visit or day case             |          |           |
| Hospital A&E visit                                |          |           |
| Speech and language therapist                     |          |           |
| Drugs, alcohol worker/addiction services          |          |           |
| Domestic violence services                        |          |           |
| Women's protection services                       |          |           |
| Adult mental health services                      |          |           |
| Child & adolescent mental health services (CAMHS) |          |           |
| Educational Psychologist                          |          |           |

**In the past six months how many times have you or the child had the following?:**

|                                           | Yourself | The Child |
|-------------------------------------------|----------|-----------|
| Police Call Out due to incident or arrest |          |           |
| Visit from Police Liaison Office          |          |           |

**In the past six months how many overnight stays have you or the child had in hospital?:**

|                                | Yourself | The Child |
|--------------------------------|----------|-----------|
| Total nights spent in hospital |          |           |

**In the past six months how many days have you or the child spent in residential or respite care?:**

|                                                           | Yourself | The Child |
|-----------------------------------------------------------|----------|-----------|
| Total number of days spent in residential or respite care |          |           |

**In the past six months how much time did you spend on child care services for the child?:**

|                                                | Number of Half Days per Week | Number of Full Days Per Week | How many weeks in the last six months did the child attend this service? |
|------------------------------------------------|------------------------------|------------------------------|--------------------------------------------------------------------------|
| State (free/reduced cost) nursery / child care |                              |                              |                                                                          |
| Private (paid) nursery / child care            |                              |                              |                                                                          |
| Pre-school                                     |                              |                              |                                                                          |

Appendix 4: Figure: Health Economics Logic Model

# Economic Logic model

*Investing in Children: use trial outcomes to model lifetime impacts on key sectors*  
*Assign probabilities, costs and sector specific outcomes*

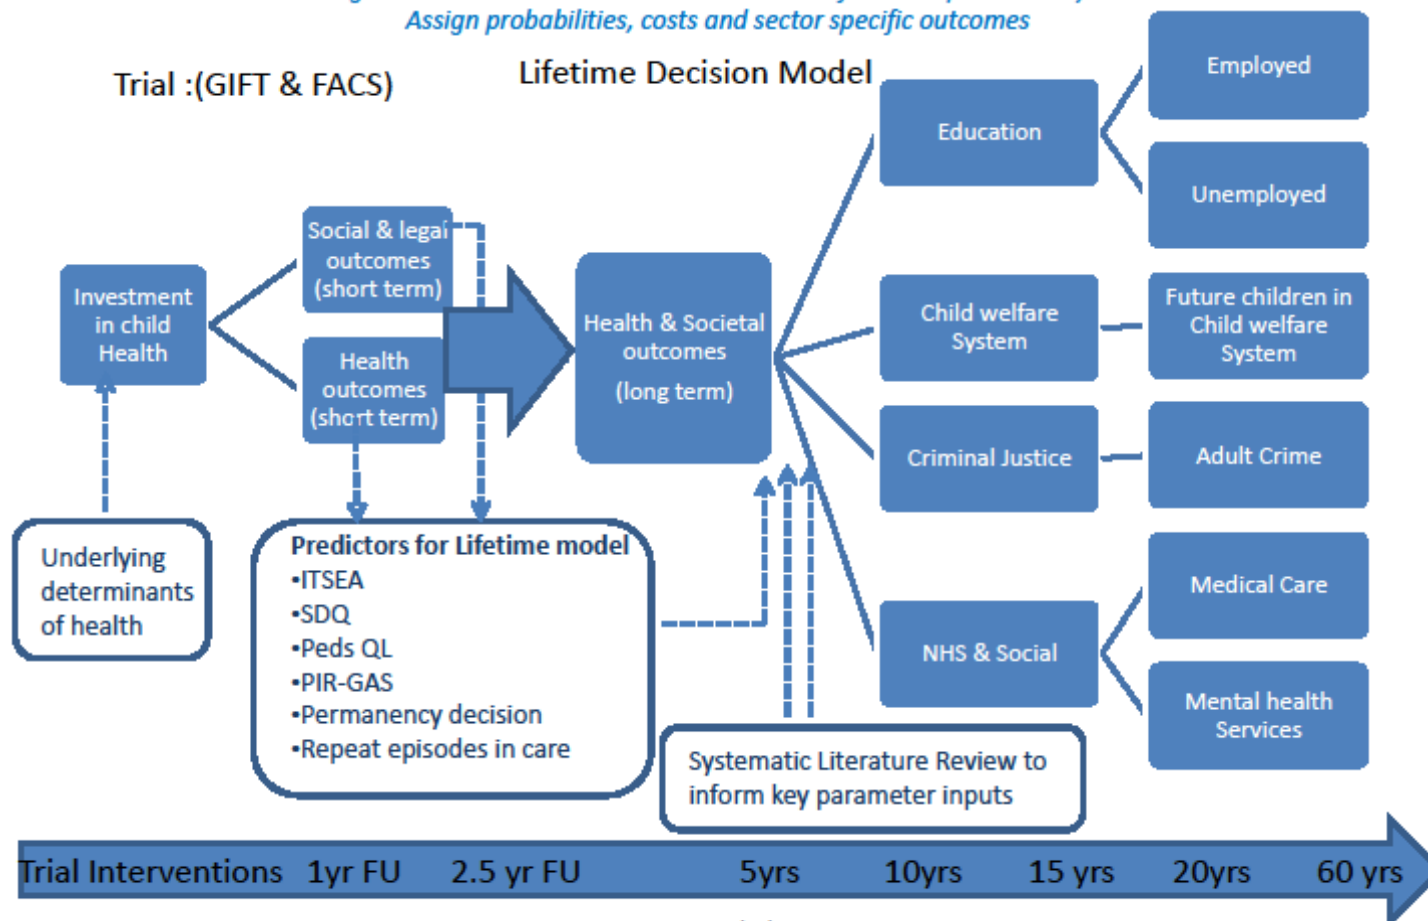

Adapted from Belli, et al. 2005 Investing in Childrens Health , BWHO, 2005:83(10)
